# Supplementary material for: A Novel Long Non-Coding RNA-01488 Suppressed Metastasis and Tumorigenesis by Inducing miRNAs That Reduce Vimentin Expression and Ubiquitination of Cyclin E
Source: MDPI journal article supplement (doi:10.3390/cells9061504), 2020-06-20
Supplement: s1 [file s1]

Supplementary materials:

Figure S1. The list of top10 dysregulated lincRNAs in two HCCs by microarray analysis.

Figure S1.  
Downregulation or upregulation of lincRNA profiling from two HCC samples  
(Top 1-10)

| Down regulation of lincRNA | Up regulation of lincRNA |
|----------------------------|--------------------------|
| LOC255167                  | AGSK1                    |
| LOC100506229               | ANKRD20A8P               |
| C3P1                       | ANXA2P1                  |
| XLOC_003629                | ANXA2P3                  |
| FAM99A                     | ARGFXP2                  |
| LOC100507389               | AURKAPS1                 |
| XLOC_009194 (LINC01488)    | C12orf32                 |
| XLOC_I2_013064             | C12orf47                 |
| LOC100271831               | C17orf76-AS1             |
| XLOC_I2_011612             | C17orf88                 |

Figure S2. The EMT markers in LINC01488 depleted- or overexpressing- hepatoma stable cells determined via immunofluorescence assay.

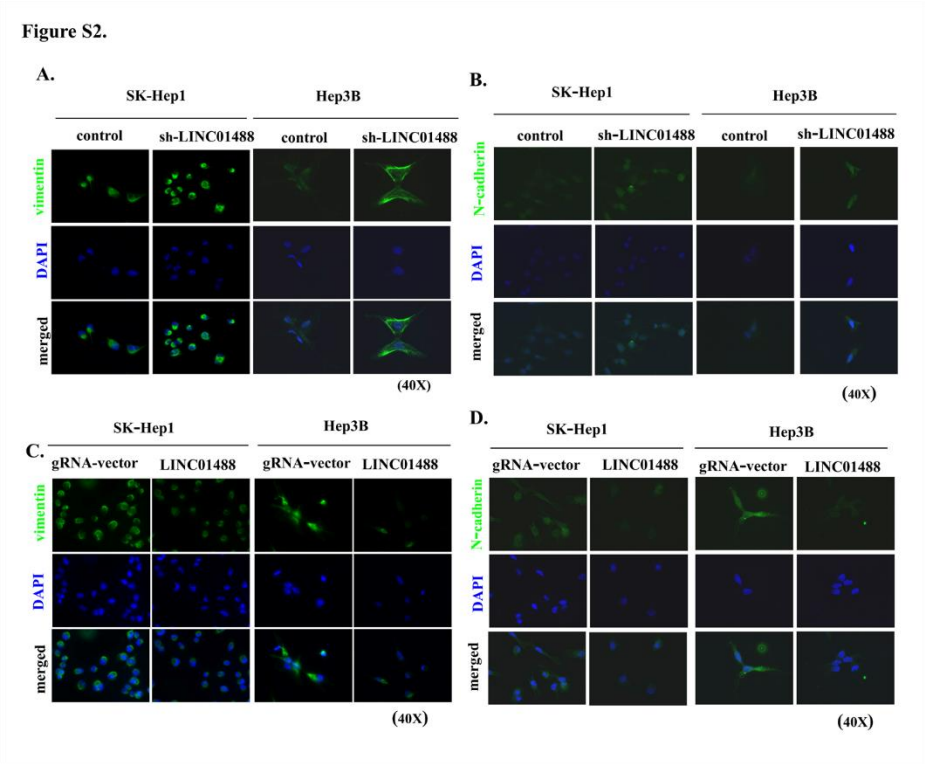

(A, B) Depletion of LINC01488 affected EMT expression levels in SK-Hep1 or Hep3B cells. (C, D) Forced expression of LINC01488 suppressed EMT expression levels in SK-Hep1 or Hep3B cells.

**Figure S3. LINC01488 regulates the anti-metastatic/anti-proliferative mechanism through vimentin/cyclin E, respectively.**

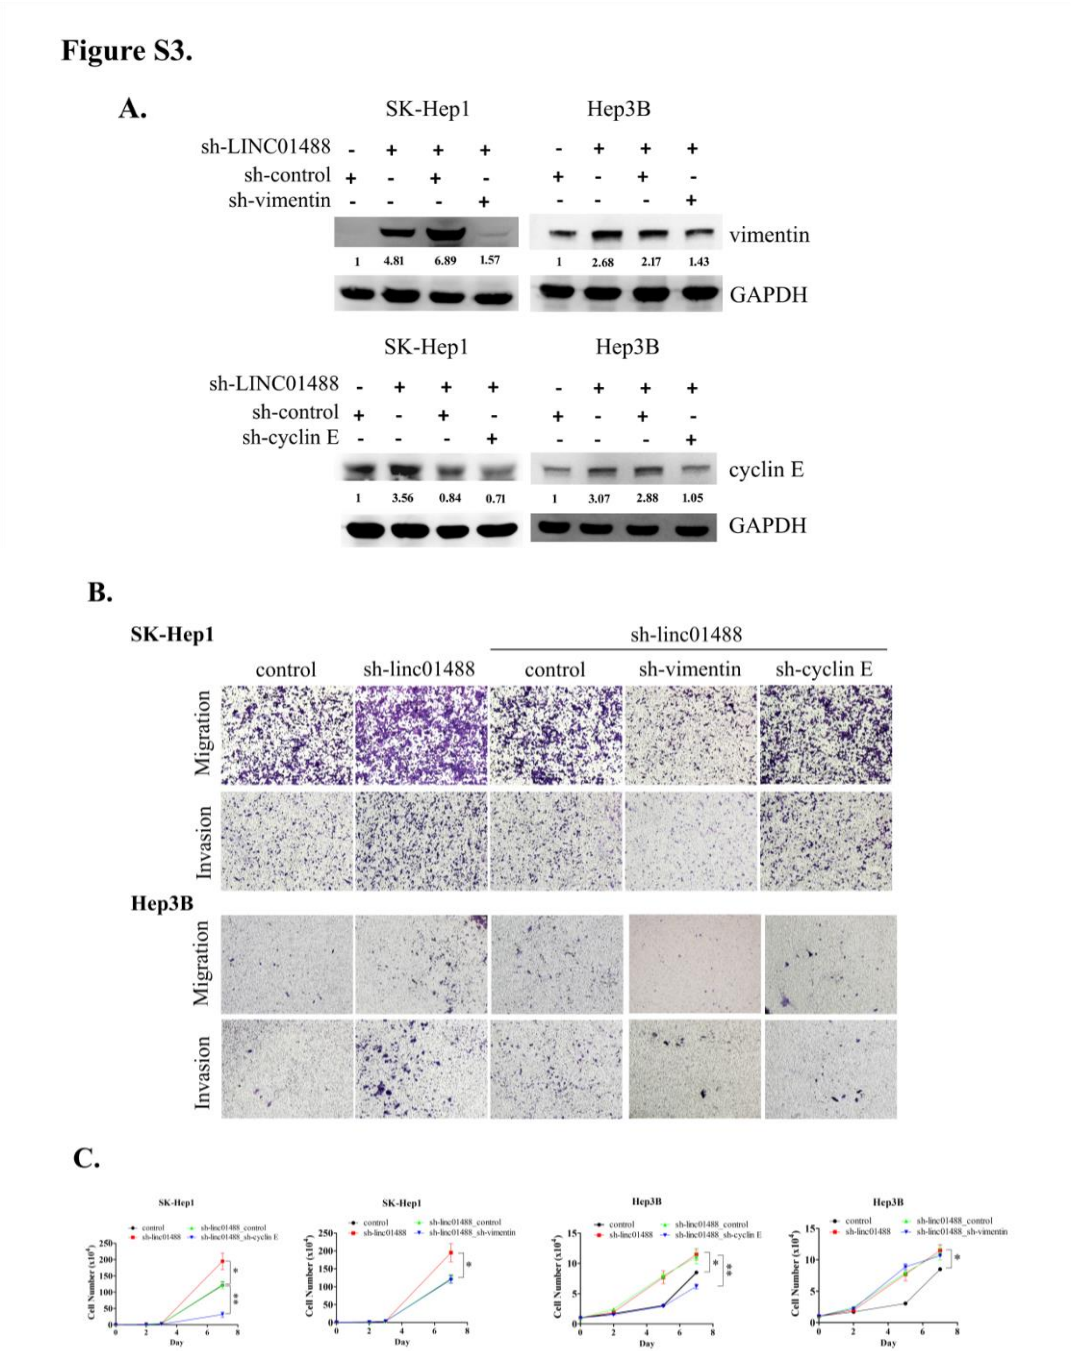

(A) The protein expression levels of vimentin- or cyclin E-knockdown in LINC01488-depleted cells (SK-Hep1 and Hep3B) were assayed by western blot. (B) Further, the migratory/invasive capabilities were determined in vimentin-knockdown as well as LINC01488-depleted cells compared with ctrl-shRNA cells (SK-Hep1 and Hep3B). (C) In proliferative assay, cyclin E-shRNA (blue) or vimentin-shRNA(blue) knockdown in LINC01488-depleted cells was determined compared with the ctrl-shRNA (green) (SK-Hep1 and Hep3B). Data are presented as means  $\pm$  SD (\* $p$ <0.05; \*\* $p$ <0.01).

**Figure S4. LINC01488 don't bind to vimentin via RIP assay.**

**Figure S4.**

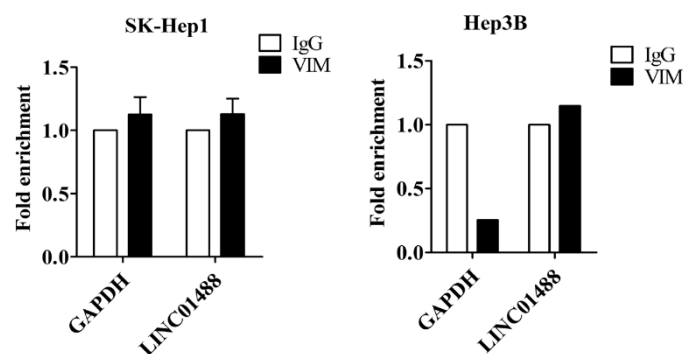

RNA immunoprecipitation (RIP) assay to determine interactions between LINC01488 and vimentin in SK-Hep1 and Hep3B cells. Data are presented as means  $\pm$  SD (\* $p$ <0.05; \*\* $p$ <0.01).

**Figure S5. LINC01488 doesn't interact with CDKs by RIP assay.**

**Figure S5.**

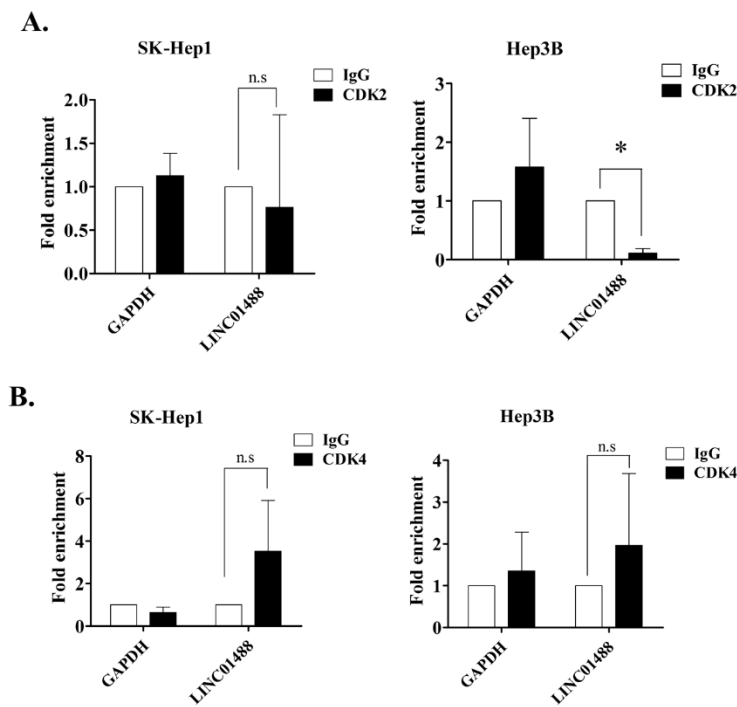

(A, B) RIP assay to determine interactions between LINC01488 and CDK2 or CDK4 in SK-Hep1 or Hep3B cells. Data are presented as means  $\pm$  SD (\* $p < 0.05$ ; \*\* $p < 0.01$ ).

**Figure S6. The mRNA level of cyclin E don't regulate by LINC01488.**

**Figure S6.**

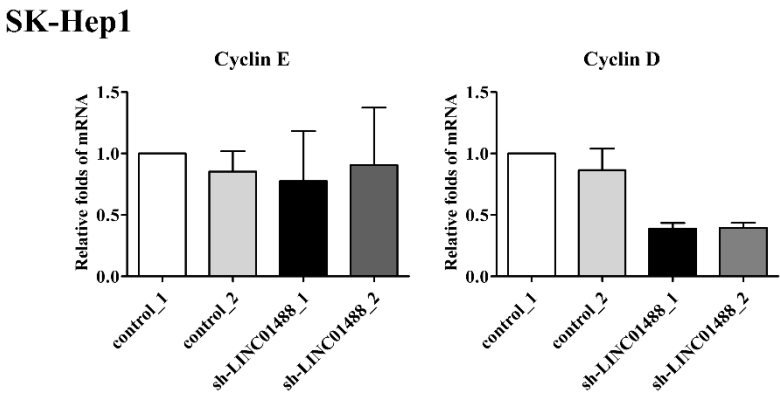

Depletion of LINC01488 don't affect cyclin E and cyclin D expression levels in SK-

Hep1 cells, as determined via q-RT-PCR. Data are presented as means  $\pm$  SD (\*p<0.05; \*\*p<0.01).

**Figure S7 Lists of primer and sgRNA sequence.**

**Figure S7**

**A.**

| shRNA           | Primer sequence                                          |
|-----------------|----------------------------------------------------------|
| sh_LINC01488#1F | ccggAGCAGGGACACAGCATGAAGGctcgagCCTTCATGCTGTGTCCCTGCTtttt |
| sh_LINC01488#1R | aattaaaaAGCAGGGACACAGCATGAAGGctcgagCCTTCATGCTGTGTCCCTGCT |
| sh_LINC01488#2F | ccggAGCATCATCACAAGGGTGCTTctcgagAAGCACCTTGTGATGATGCTtttt  |
| sh_LINC01488#1R | aattaaaaAGCATCATCACAAGGGTGCTTctcgagAAGCACCTTGTGATGATGCT  |

**B.**

| Gene       | Q-PCR Primer sequence (Forward) | Q-PCR Primer sequence (Reverse) |
|------------|---------------------------------|---------------------------------|
| LINC01488  | TTTGTGTCTGCACTATTCCAAAG         | GGCTGATCTGATGCAGATCCTT          |
| Vimentin   | GACGCCATCAACACCGAGTT            | CTTTGTCGTTGGTTAGCTGGT           |
| N-cadherin | AGCCAACCTTAAGTGGAGGAGT          | GGCAAGTTGATTGGAGGGATG           |
| MMP-9      | GGGACGCAGACATCGTCATC            | TCGTCATCGTCGAAATGGGC            |
| Cyclin E   | ACTCAACGTGCAAGCCTCG             | GCTCAAGAAAGTGCTGATCCC           |
| Cyclin D   | CAATGACCCCGCACGATTTC            | CATGGAGGGCGGATTGGAA             |

**C.**

| Sample          | sgRNA sequence          | score |
|-----------------|-------------------------|-------|
| LINC01488-sgRNA | TGGTGCTGTGGACGGCTTCAGGG | 80    |

**D.**

| MicroRNA   | Precursor-miR Q-PCR primer (Forward) | Precursor-miR Q-PCR primer (Reverse) |
|------------|--------------------------------------|--------------------------------------|
| Pre-mir124 | AGGCCTCTCTCCGTGTTT                   | CAGCCCCATTCTTGGCATTC                 |
| Pre-mir138 | CGTTGCTGCAGCTGGTGTTG                 | TGATGCAACCCTGGTGTCGT                 |

The list of primer sequences for (A) shRNAs of LINC01488, (B) genes of LINC01488, vimentin, N-cadherin, MMP-9, cyclinE and cyclinD, (C) sgRNA of LINC01488 and (D) pre-miRs (miR-124 and miR-138) by qRT-PCR assay.
